# Supplementary material for: Early Endothelial Dysfunction in Type 1 Diabetes Is Accompanied by an Impairment of Vascular Smooth Muscle Function: A Meta-Analysis
Source: PubMed Central journal article supplement (PMC7180178; doi:10.3389/fendo.2020.00203), 2020-04-17

# Vascular smooth muscle function

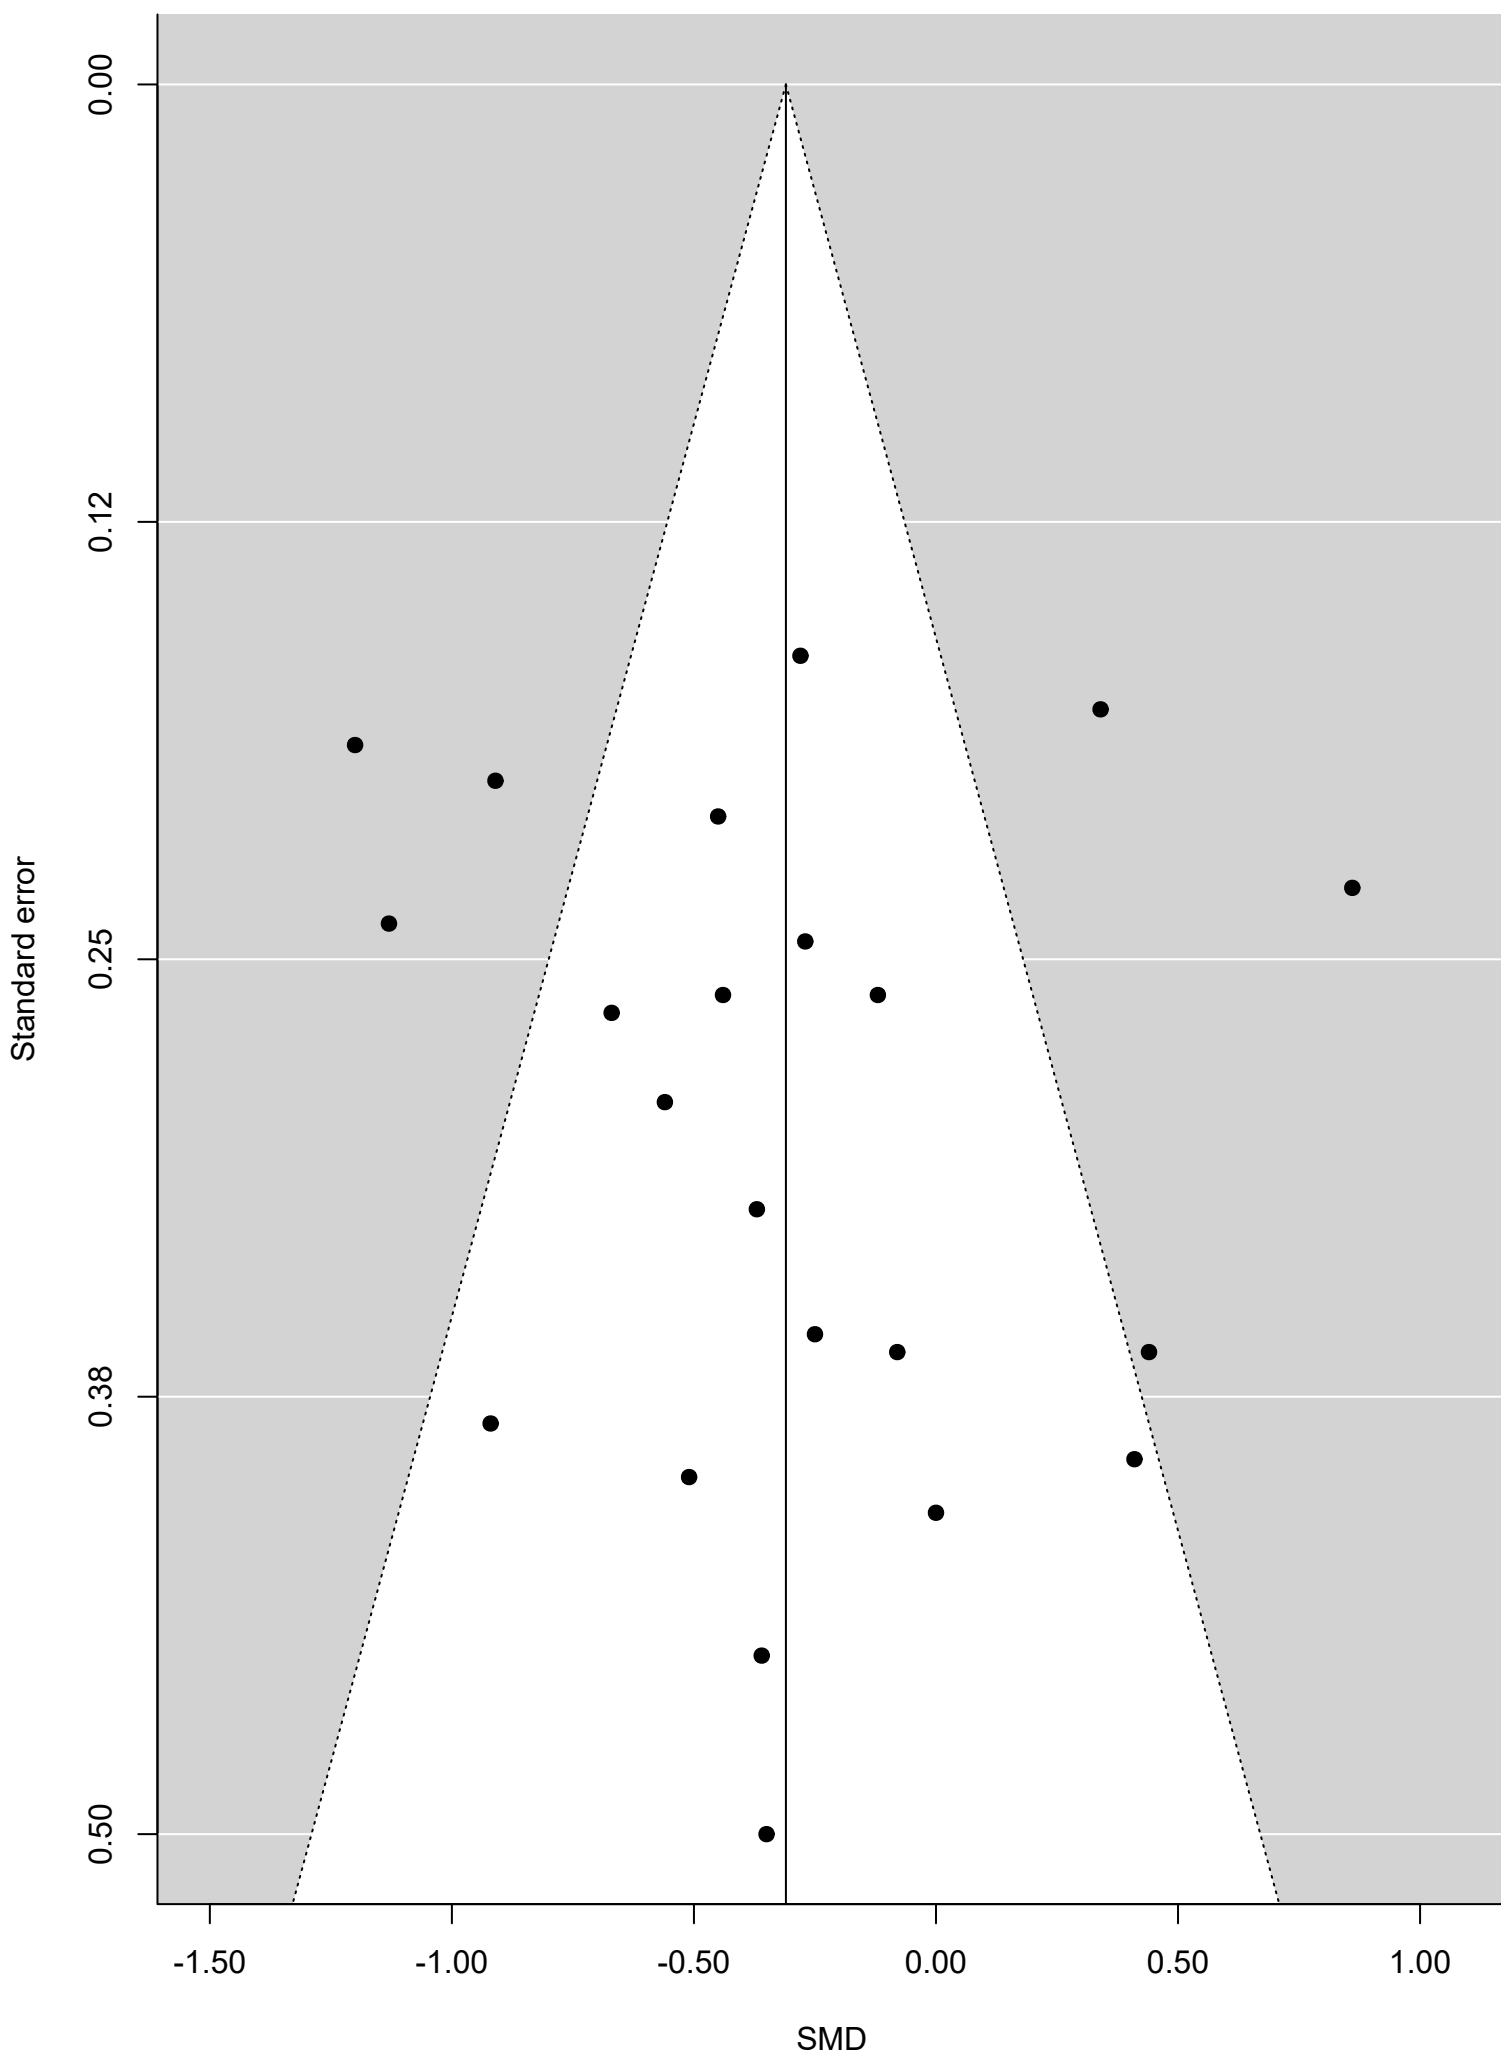

Supplement: Image_2.pdf [file Image_2.pdf]
