# Supplementary material for: Early Endothelial Dysfunction in Type 1 Diabetes Is Accompanied by an Impairment of Vascular Smooth Muscle Function: A Meta-Analysis
Source: PubMed Central journal article supplement (PMC7180178; doi:10.3389/fendo.2020.00203), 2020-04-17
Supplement: Image_3.pdf [file Image_3.pdf]

### S3a – Techniques of exercise in microcirculation

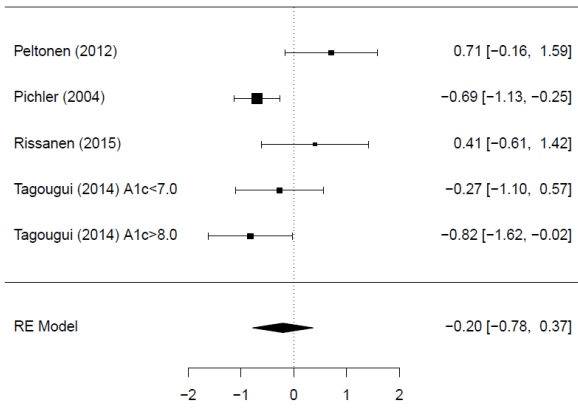

NIRS –  $Z = -0.69$ ,  $p = 0.49$ ,  $I^2 = 65\%$ ,  $p_{het} = 0.02$

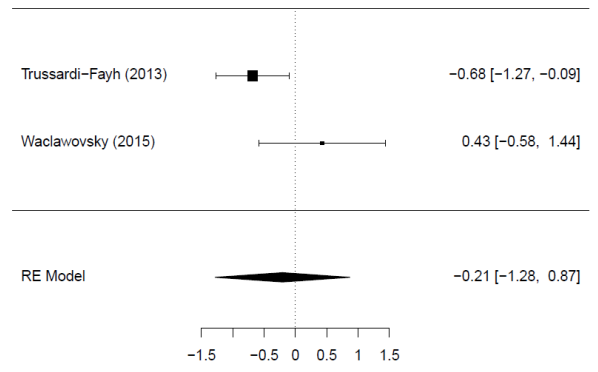

Plethysmography –  $Z = -0.37$ ,  $p = 0.71$ ,  $I^2 = 71\%$ ,  $p_{het} = 0.06$

### S3b – Techniques of PORH in microcirculation

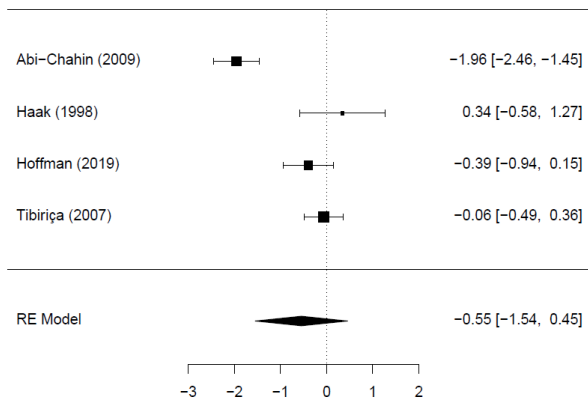

Capillaroscopy –  $Z = -1.07$ ,  $p = 0.28$ ,  $I^2 = 92\%$ ,  $p_{het} < 0.001$

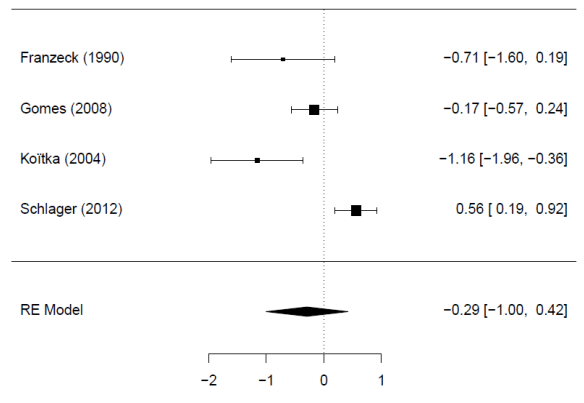

Laser Doppler –  $Z = -0.81$ ,  $p = 0.42$ ,  $I^2 = 85\%$ ,  $p_{het} < 0.001$

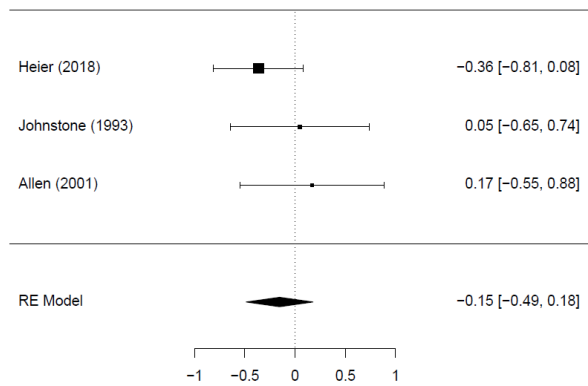

Plethysmography –  $Z = -0.91$ ,  $p = 0.36$ ,  $I^2 = 0\%$ ,  $p_{het} = 0.38$

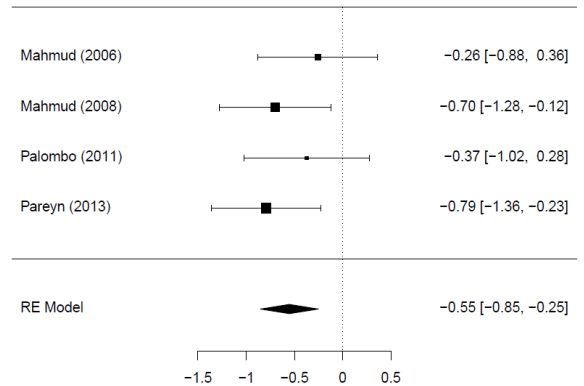

Tonometry –  $Z = -3.6$ ,  $p < 0.001$ ,  $I^2 = 0\%$ ,  $p_{het} = 0.55$

### S3c – Techniques of pharmacological substances in microcirculation

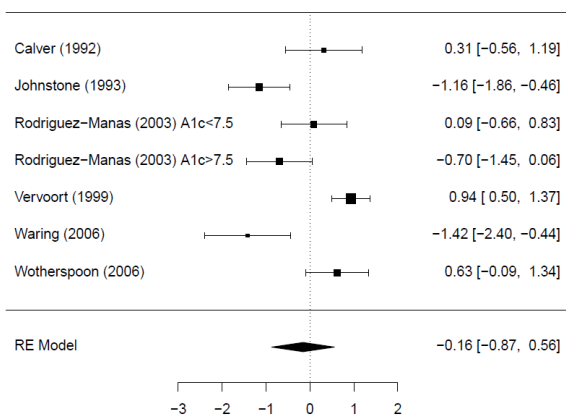

Plethysmography –  $Z = -0.43$ ,  $p = 0.67$ ,  $I^2 = 86\%$ ,  $p_{het} < 0.001$

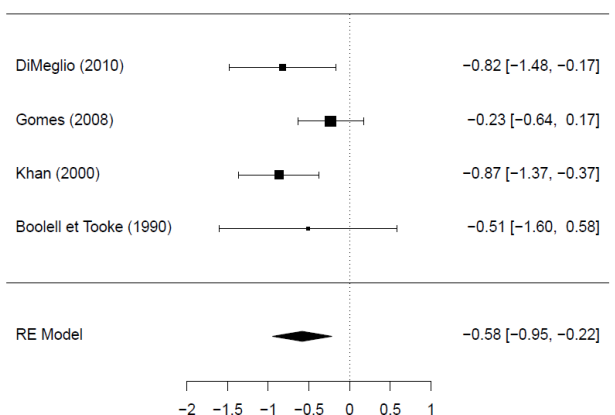

Laser Doppler –  $Z = -3.14$ ,  $p = 0.002$ ,  $I^2 = 35\%$ ,  $p_{het} = 0.21$
